# Supplementary material for: RNA-Seq analysis on chicken taste sensory organs: An ideal system to study organogenesis
Source: PubMed Central journal article supplement (PMC5567234; doi:10.1038/s41598-017-09299-7), 2017-08-22
Supplement: 41598_2017_9299_MOESM1_ESM.pdf [file 41598_2017_9299_MOESM1_ESM.pdf]

## **RNA-Seq analysis on chicken taste sensory organs:**

### **An ideal system to study organogenesis**

Xiaogang Cui<sup>1,2</sup>, Brett Marshall<sup>1,2</sup>, Ning Shi<sup>3</sup>, Shi-You Chen<sup>3</sup>, Romdhane Rekaya<sup>2,4</sup>, Hong-Xiang Liu<sup>1,2\*</sup>

<sup>1</sup> Regenerative Bioscience Center, University of Georgia, Athens, GA, USA

<sup>2</sup> Department of Animal and Dairy Science, College of Agricultural and Environmental Sciences, University of Georgia, Athens, GA, USA

<sup>3</sup> Department of Physiology and Pharmacology, College of Veterinary Medicine, University of Georgia, Athens, GA, USA

<sup>4</sup> Institute of Bioinformatics, University of Georgia, Athens, GA, USA

Running title: RNA-Seq analysis in chicken taste organs

\*Correspondence should be sent to: Hong-Xiang Liu, Regenerative Bioscience Center, Department of Animal and Dairy Science, College of Agricultural and Environmental Sciences, University of Georgia, 425 River Road, Athens, GA 30602, USA. Email: [lhx@uga.edu](mailto:lhx@uga.edu).

**Supplemental Table S1. Summary statistics for sequence quality and alignment information of nine samples.**

| <b>Statistic</b>      | <b>GE1</b> | <b>GE2</b> | <b>GE3</b> | <b>GM1</b> | <b>GM2</b> | <b>GM3</b> | <b>NGE1</b> | <b>NGE2</b> | <b>NGE3</b> |
|-----------------------|------------|------------|------------|------------|------------|------------|-------------|-------------|-------------|
| Raw Reads             | 59,946,034 | 42,835,845 | 36,119,850 | 30,189,852 | 35,937,806 | 21,678,518 | 33,873,435  | 40,615,590  | 34,460,014  |
| Clean Reads           | 58,147,653 | 41,550,770 | 35,036,254 | 29,284,156 | 34,859,672 | 21,028,162 | 32,857,232  | 39,397,122  | 33,426,214  |
| Q20 (%)               | 94.75      | 96.59      | 95.48      | 96.71      | 94.99      | 96.41      | 95.23       | 96.57       | 94.57       |
| Q30 (%)               | 90.08      | 90.06      | 90.12      | 90.3       | 90.21      | 89.94      | 90.25       | 90.04       | 89.84       |
| GC content (%)        | 46.31      | 47.7       | 48.6       | 46.98      | 47.78      | 48.95      | 46.35       | 47.45       | 48.38       |
| Total mapped reads    | 33,193,001 | 34,626,935 | 28,133,701 | 25,009,799 | 28,798,643 | 17,431,655 | 27,508,537  | 32,613,280  | 26,821,995  |
| Unique mapped reads   | 32,761,270 | 34,038,694 | 27,491,354 | 24,590,659 | 27,858,349 | 16,831,061 | 27,097,869  | 32,000,075  | 26,188,443  |
| Multiple mapped reads | 431,509    | 588,658    | 647,075    | 425,167    | 921,556    | 592,676    | 412,628     | 587,039     | 616,906     |
| Spliced mapped reads  | 8,449,099  | 8,941,284  | 6,932,976  | 6,946,082  | 7,308,376  | 4,756,427  | 6,731,585   | 8,166,181   | 6,801,035   |
| Mapping Rate (%)      | 85.65      | 83.34      | 80.36      | 85.48      | 82.62      | 82.93      | 83.74       | 82.86       | 80.26       |
