# Supplementary material for: RNA-Seq analysis on chicken taste sensory organs: An ideal system to study organogenesis
Source: PubMed Central journal article supplement (PMC5567234; doi:10.1038/s41598-017-09299-7), 2017-08-22
Supplement: 41598_2017_9299_MOESM2_ESM.pdf [file 41598_2017_9299_MOESM2_ESM.pdf]

## **RNA-Seq analysis on chicken taste sensory organs:**

### **An ideal system to study organogenesis**

Xiaogang Cui<sup>1,2</sup>, Brett Marshall<sup>1,2</sup>, Ning Shi<sup>3</sup>, Shi-You Chen<sup>3</sup>, Romdhane Rekaya<sup>2,4</sup>, Hong-Xiang Liu<sup>1,2\*</sup>

<sup>1</sup> Regenerative Bioscience Center, University of Georgia, Athens, GA, USA

<sup>2</sup> Department of Animal and Dairy Science, College of Agricultural and Environmental Sciences, University of Georgia, Athens, GA, USA

<sup>3</sup> Department of Physiology and Pharmacology, College of Veterinary Medicine, University of Georgia, Athens, GA, USA

<sup>4</sup> Institute of Bioinformatics, University of Georgia, Athens, GA, USA

Running title: RNA-Seq analysis in chicken taste organs

\*Correspondence should be sent to: Hong-Xiang Liu, Regenerative Bioscience Center, Department of Animal and Dairy Science, College of Agricultural and Environmental Sciences, University of Georgia, 425 River Road, Athens, GA 30602, USA. Email: [lhx@uga.edu](mailto:lhx@uga.edu).

**Supplemental Table S2, Primers information and validation results of the 14 chosen differentially expressed genes (GE vs NGE) by qRT-PCR analysis.**

| <b>Gene Name</b>        | <b>Log2 FC by RNA-Seq</b> | <b>Log2 FC by qRT-PCR</b> | <b>Forward primer sequence</b> | <b>Reverse primer Sequence</b> | <b>Amplicon (bp)</b> |
|-------------------------|---------------------------|---------------------------|--------------------------------|--------------------------------|----------------------|
| <i>USP13</i>            | -1.81                     | 0.22                      | AGAAGGTACCAGGGGCATCT           | TCACCAGTGCTGGTAACTCTTC         | 189                  |
| <i>DHX30</i>            | -1.52                     | -0.53                     | AGAACCAGGTGGGATCCTCT           | CGCTGGAAGATGTTCTGTTG           | 159                  |
| <i>LAMP3</i>            | -1.47                     | -1.5                      | ATTCGCCAGCAGCATTITAC           | CGGGAAGTGCCTTTGTACTT           | 190                  |
| <i>ACE</i>              | -6.11                     | -6.54                     | CGGATCAAGGAGGACGAATA           | CTGGATCACGAAGCTGACAA           | 168                  |
| <i>CD36</i>             | 2.27                      | 0.98                      | TGCAATTTGCCAAAAGACTG           | CCGACCGGTGACTTTATTTTC          | 195                  |
| <i>EYA2</i>             | 2.38                      | 1.37                      | ACGGCATACTTCCTACAGC            | ATTGGCTCCCTGGTAAATCC           | 164                  |
| <i>LPP</i>              | 1.83                      | -1.12                     | TTGAAAATCGGTGGGAACAT           | CACTGGACATGGAAGTCACG           | 152                  |
| <i>PCDH10</i>           | 2.36                      | 2.59                      | AAAATTCCAACGGCAGCAT            | GCTCACTGTCTCCATGACCA           | 153                  |
| <i>RHCG</i>             | 1.53                      | 1.56                      | ATCCTCCTCAACCTGCTTCA           | GGGCCAGTACATCCACAGAT           | 198                  |
| <i>GNAT3</i>            | 5.5                       | 1.8                       | GGTGCTGGAGAGTCAGGAAA           | CAATTCTAGCGGGGTTTTCA           | 187                  |
| <i>TRPM5</i>            | 1.37                      | 1                         | GACAATGGGGCCAACATAAC           | TCTCCTGCTGTTGACCAGTG           | 157                  |
| <i>TAS1R3</i>           | 1.37                      | 0.51                      | TGGGTGCTGCTGTGTATGAG           | TACTGTCAGCTGTGCCCAAG           | 237                  |
| <i>LGR5</i>             | 4.84                      | 6.18                      | CAAAGCAGACACATTCCGGC           | GTAGCCCCGTCACAGGAAAA           | 161                  |
| <i>KRT20</i>            | 1.34                      | 1.78                      | AGCTTGTCTGCAGATCGAC            | GCAGTCTGTCAACCTCCTCC           | 228                  |
| <i>GAPDH</i> as control |                           |                           | CGTCCTCTCTGGCAAAGTCC           | TTCCCGTTCTCAGCCTTGAC           |                      |

**Abbreviations: FC=fold change**
